# Supplementary material for: Cotton's Ancient Genesis: Amber Fossils from 99 Million-Year-Old Mid-Cretaceous Redefine Evolutionary Roadmap in Malvaceae
Source: Research Square preprint supplement (doi:10.21203/rs.3.rs-7639340/v1), 2025-10-03
Supplement: Supplementary file 1 [file adf5ecd0c45809710ece2b35.docx]

**Supplementary**

**Cotton's Ancient Genesis: Amber Fossils from 99 Million-Year-Old Mid-Cretaceous Redefine Evolutionary Significance in Malvaceae**

Weijia Huang1, Wenzhe Liu2, Jie Sun3, Yali Li4, Xin Wang5,*

**Affiliation**

*1Blue Miracle Museum Science Research Studio, Guangzhou 510000, China, ORCID: 0000-0002-5112-8931*

*2Key Laboratory of Resource Biology and Biotechnology in Western China*

*(Ministry of Education), School of Life Sciences, Northwest University, Xi’an 710069, China, ORCID: 0000-0002-7738-0086*

*3Shaanxi Key Laboratory of Early Life and Environments, State Key Laboratory of Continental Dynamics, Department of Geology, Northwest University, Xi’an 710069, China, ORCID: 0009-0005-4870-9670*

*4Qinling National Botanical Garden, Xi’an 712100, China, ORCID: 0009-0003-9241-9043*

*5State Key Laboratory of Palaeobiology and Stratigraphy, Nanjing Institute of Geology and Palaeontology and Center for Excellence in Life and Paleoenvironment, Chinese Academy of Sciences, Nanjing 210008, China*

*Email: [xinwang@nigpas.ac.cn](mailto:xinwang@nigpas.ac.cn), ORCID: 0000-0002-4053-5515

**Fig. S1 General information of the Myanmar amber. A. The whole block of amber. B. Fifteen seed-containing bubbles of variable sizes in the amber.**


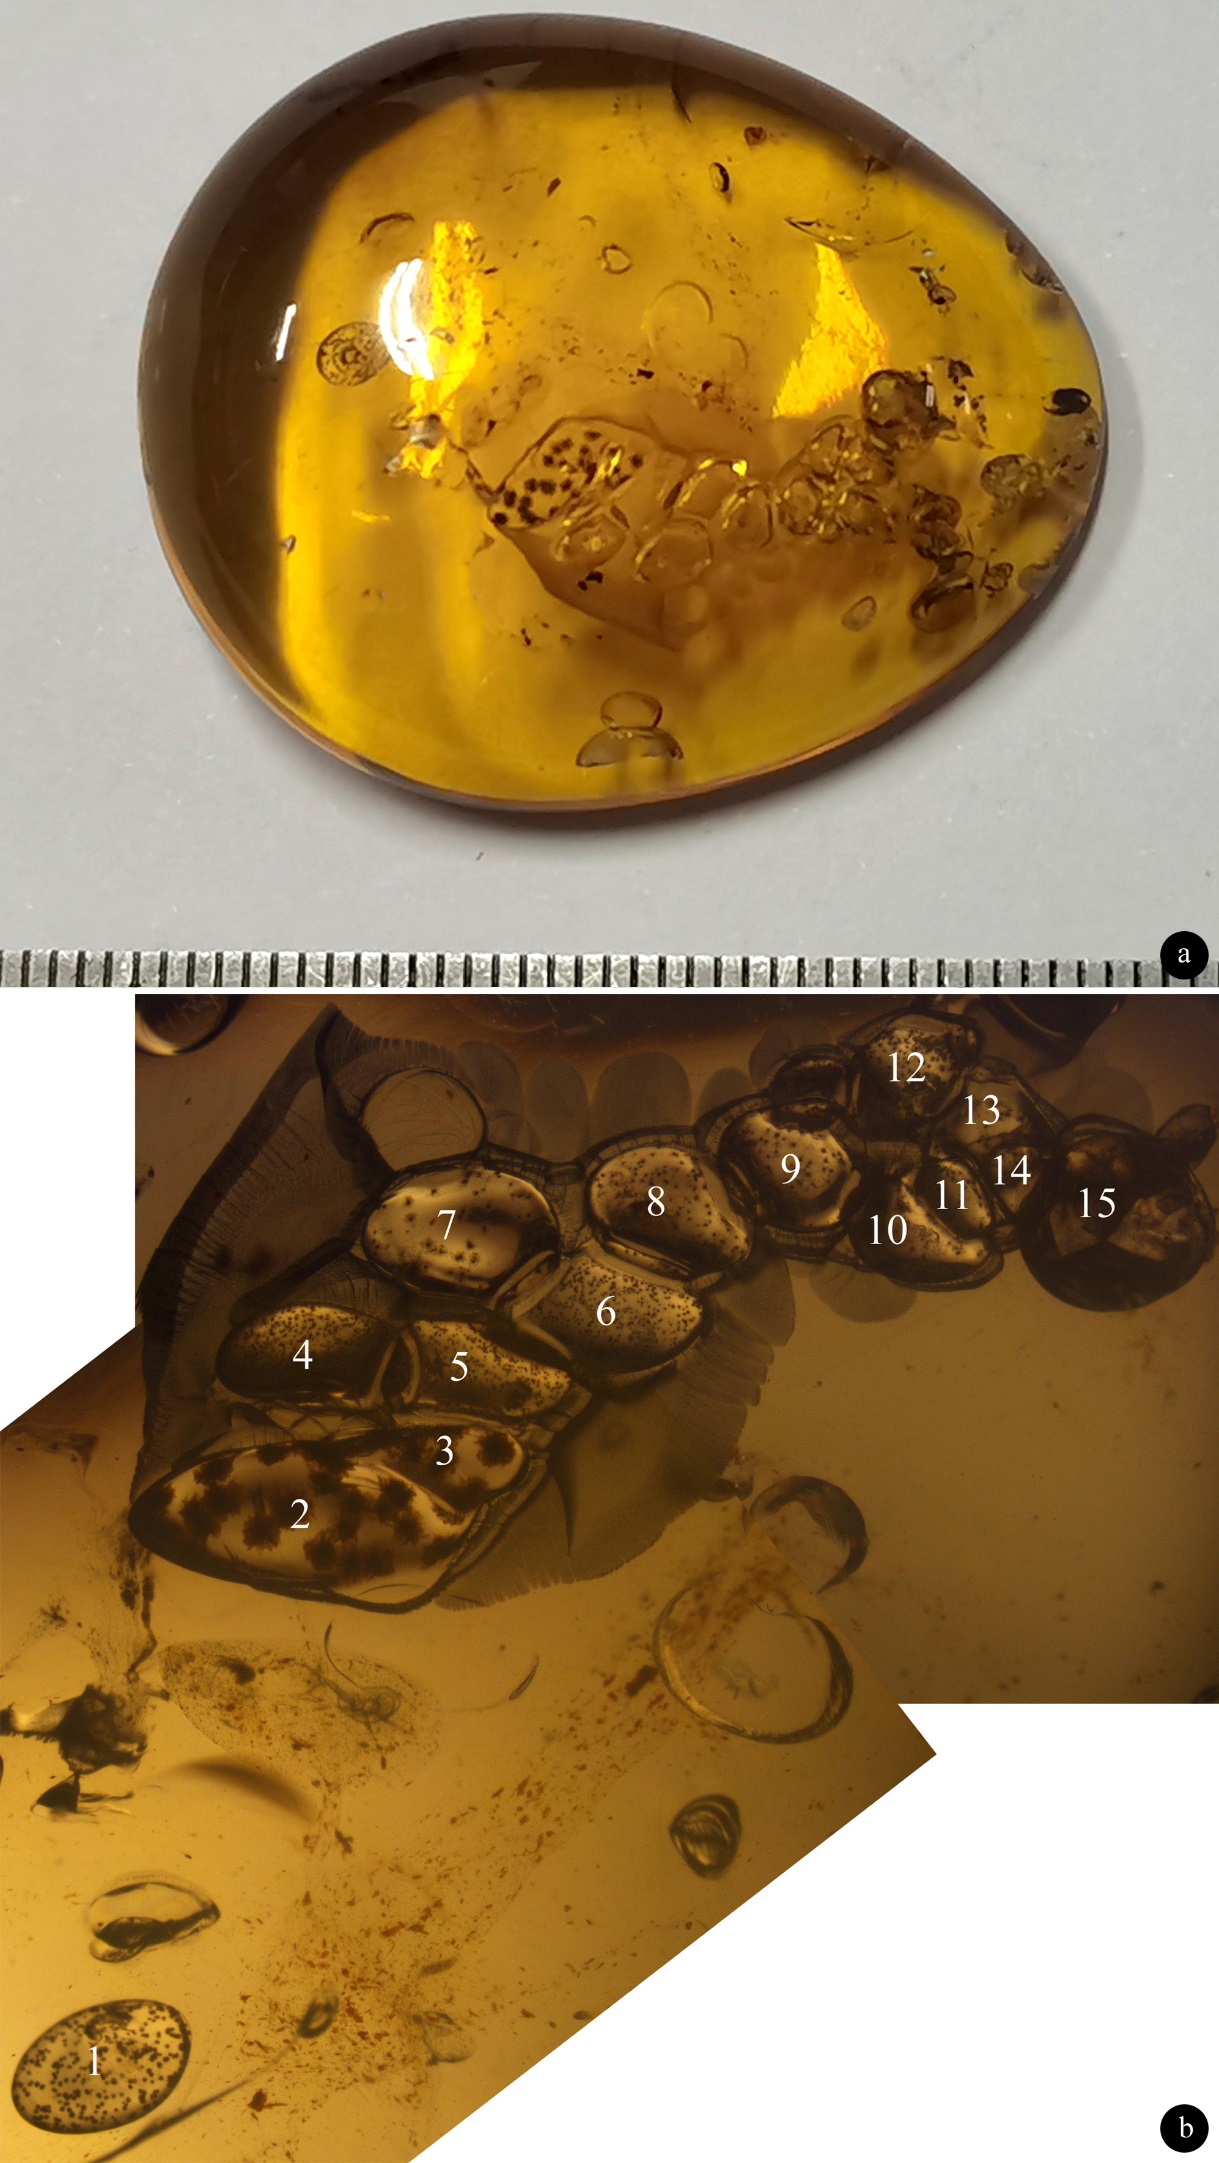


**Table S1. Comparison among extant angiosperms producing hairy seeds.**

| Family | Taxa | Age | Hair form | Hair attachement | Hair length | Seed body position | Seed form | Seed length | Reference |
| --- | --- | --- | --- | --- | --- | --- | --- | --- | --- |
| Malvaceae | ***Eogossypium maxima*** | Cretaceous | twisted | seed-surface | 119-254 μm | central | spheroid | 131-160 μm | Present study |
| ***Eogossypium intermedia*** | Cretaceous | sinuous | seed-surface | 100-110 μm | central | spheroid | 40-75 μm |
| ***Eogossypium minuta*** | Cretaceous | sinuous | seed-surface | 62 μm | central | spheroid | 28-43 μm |
| ***Eogossypium minima*** | Cretaceous | spine-like | seed-surface | up to 23 μm | central | spheroid | 69-82 μm |
| *Gossypium hirsutum, G. tomentosum, G. sturtianum, G. arboreum, G. herbaceum* subsp. *africanum, G. raimondii, G. davidsonii, G. longicalyx, G. anomalum* | extant | sinuous | seed-surface | 0-60 mm | central | oval, tapered | 4.5-13 mm | 1-6 |
| *Bombax* | extant | sinuous | seed pod | up to 30 mm | basal | obovoid | 6~9 mm | 7-9 |
| *Ceiba* | extant | sinuous | seed pod | up to 32 mm | basal | obovoid | up to 6 mm | 10,11 |
|  | Baisian achene | Cretaceous | twisted, in facsicles | basal | >7 mm | apical | flasked | 3.6 mm | 12 |
|  | *Problematospermum* | Jurassic-Cretaceous | straight, forked | basal | 16 mm | apical | fusiform | 1.6-8.4 mm | 13 |
| Salicaceae | *Salix* | extant | straight, cylindrical | basal | 3.8~4.2 mm | apical | flasked | 1.2~1.4 mm | 14 |
| *Populus* | extant | straight , cylindrical | basal | 4 mm | apical | fusiform | ~1.1 mm | 9,14 |
| Tamaricaceae | *Tamarix* | extant | straight | apical | >1 mm | basal | oval | 0.5 mm | 15 |

**Table S2. Numbers of linted seeds in various bubbles.**

| **Bubble** | **Seed type** | **Number of seeds** |
| --- | --- | --- |
| 1 | *Eogossypium minima* | 259 |
| 2 | *Eogossypium maxima* | 18 |
| 3 | *Eogossypium maxima* | 6 |
| 4 | *Eogossypium minima* | 200 |
| 5 | *Eogossypium minima* | 200 |
| 6 | *Eogossypium minima* | 155 |
| 7 | *Eogossypium intermedia* | 30 |
| 8 | *Eogossypium minuta* | 82 |
| 9 | *Eogossypium minuta* | 50 |
| 10 | *Eogossypium intermedia* | 18 |
| 11 | *Eogossypium minuta* | 29 |
| 12 | *Eogossypium minuta* | 119 |
| 13 | *Eogossypium minuta* | 15 |
| 14 | *Eogossypium minuta* | 18 |
| 15 | *Eogossypium minuta* | 14 |

**Table S3. Measurements of various species of *Eogossypium*.**

| Taxon | Number of seeds | Diameter of seed | Length of hairs |
| --- | --- | --- | --- |
| *Eogossypium minima* | 814 | 69-82 μm | up to 23 μm |
| *Eogossypium minuta* | 327 | 100-120 μm | up to 62 μm |
| *Eogossypium intermedia* | 48 | 200-260 μm | up to 110 μm |
| *Eogossypium maxima* | 24 | 530-630 μm | up to 254 μm |
| **TOTAL** | **1213** |  |  |

**References**

1 Wendel, J. F. & Grover, C. E. in *Cotton* Vol. 57 (eds David D. Fang & Richard G. Percy) 25-44 (2015).

2 Dowd, M. K. in *Cotton* Vol. 57 (eds David D. Fang & Richard G. Percy) 745-781 (2015).

3 Kim, H. J. in *Cotton* Vol. 57 (eds David D. Fang & Richard G. Percy) 97-127 (2015).

4 Turley, R. B. & Kloth, R. H. Identification of a third fuzzless seed locaus in upland cotton (*Gossypium hirsutum* L.). *The Journal of Heredity* 93, 359-364, (2002).

5 Haigler, C. H. in *Physiology of Cotton* (ed J. McD. Stewart)Ch. 4, 33-47 (Springer, 2010).

6 Wendel, J. F., Brubaker, C. L. & Seelanan, T. in *Physiology of Cotton* (eds James McD. Stewart, Derrick M. oosterhuis, James J. Heitholt, & Jack R. Mauney) 1-18 (Springer Science, 2010).

7 Shah, N. C. The identification, etymology and uses of *Bombax ceiba* (semal) sold by street vendors as Semarkanda: a review. *Indian Journal of History of Science* 57, 10-15, (2022).

8 Rajendra, K. C. A breif introduction to Semal (*Bombax ceiba* Linn). 14 (George-August University, 2007).

9 Likon, M., Remškar, M., Ducman, V. & Švegl, F. Populus seed fibers as a natural source for production of oil super absorbents. *Journal of Environmental Management* 114, 158-167, (2013).

10 Gómez-Maqueo, X. & Gamboa-deBuen, A. The Biology of the genus *Ceiba*, a potential source for sustainable production of natural fiber. *Plants* 11, 521, (2022).

11 Paton, S. *Ceiba pentandra seeds*, <<https://biogeodb.stri.si.edu/bioinformatics/dfm/>> (2025).

12 Krassilov, V. A. New paleobotanical data on origin and early evolution of angiospermy. *Annals Missouri Botanical Garden* 71, 577-592, (1984).

13 Wang, X., Zheng, S. L. & Jin, J. H. Structure and relationships of *Problematospermum*, an enigmatic seed from the Jurassic of China. *International Journal of Plant Sciences* 171, 447-456, (2010).

14 Li, J. *et al.* Development, structure and evolutionary significance of seed appendages in *Salix matsudana* (Salicaceae). *PLoS ONE* 13, e0203061, (2018).

15 Li, C., Wei, X. & Lan, H. The environmental adaptation strategy of seed germination, and roles of the seed pappus on dispersal and hypocotyl hairs on seedling anchorage in *Tamarix ramosissima*. *AoB Plants* 13, 1-12, (2021).
